# Supplementary material for: Rational design and fabrication of a β-dicalcium silicate-based multifunctional cement with potential for root canal filling treatment
Source: Royal Society of Chemistry journal article supplement (doi:10.1039/c4tb00129j), 2014-01-01
Supplement: c4tb00129j1.pdf [file c4tb00129j1.pdf]

### Supporting Information

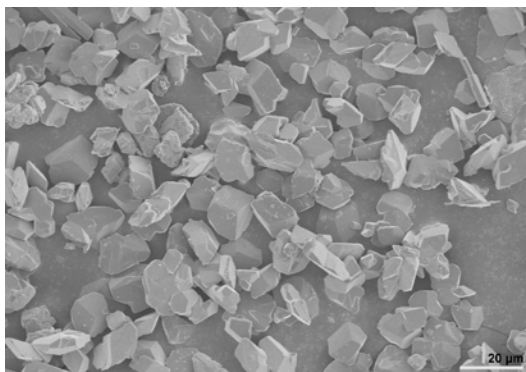

Figure S1. SEM images of  $\alpha$ -CSH powder synthesized by solution phase transformation process.

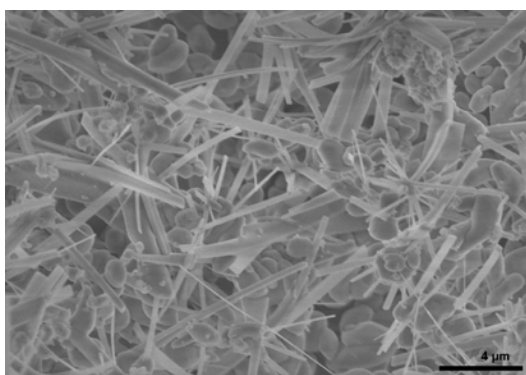

5 Figure S2. SEM image showing the surface morphology of the pure gypsum cement.

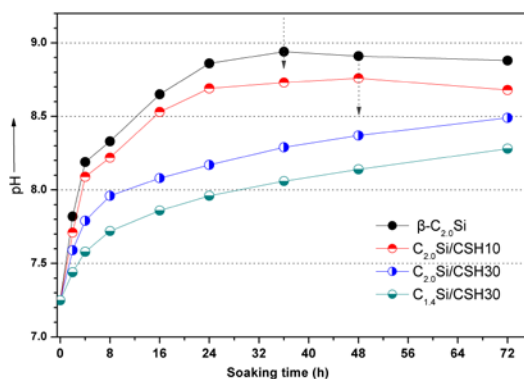

Figure S3. Changes in pH value in the SBF during soaking the cement-filled teeth.

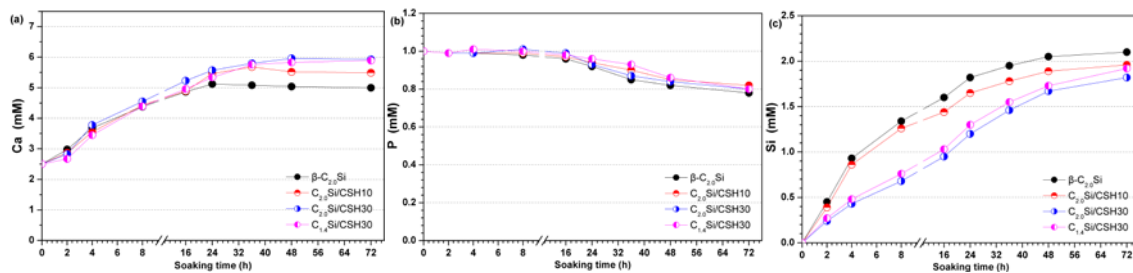

Figure S4. Changes in ion concentration in the SBF medium during soaking the cement-filled teeth.

**Table S1.** Effect of CSH on the setting time of paste.

| Sample                       | Initial<br>( <i>I</i> ) | Final<br>( <i>F</i> ) |
|------------------------------|-------------------------|-----------------------|
| $\beta$ -C <sub>2,0</sub> Si | 38                      | 65                    |
| C <sub>2,0</sub> Si/CSH10    | 36                      | 57                    |
| C <sub>2,0</sub> Si/CSH20    | 30                      | 44                    |
| C <sub>2,0</sub> Si/CSH30    | 22                      | 26                    |
